# Supplementary material for: Palynological evidence for late Miocene stepwise aridification on the northeastern Tibetan Plateau
Source: Copernicus journal article supplement (doi:10.5194/cp-12-1473-2016), 2016-07-12
Supplement: Supplementary file 1 [file cp-12-1473-2016-supplement.zip]

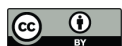

## *Supplement of*

# **Palynological evidence for late Miocene stepwise aridification on the northeastern Tibetan Plateau**

**Jia Liu et al.**

*Correspondence to:* Ji Jun Li (lijj@lzu.edu.cn)

- cp-12-1473-2016-supplement-title-page.pdf
- Data.xlsx

The copyright of individual parts of the supplement might differ from the CC-BY 3.0 licence.
